# Supplementary material
Source: PubMed Central journal article supplement (PMC2836953)

## Supplemental Figure Legends

1  
2 **Supplemental Figure 1. Antimicrobial effects of xenophagosomes on Syntaxin7 and**  
3 **Syntaxin8-depleted cells.** (A) HeLa cells were transfected with siRNA for the control,  
4 Syntaxin7, and Syntaxin8. At 48 hours after transfection, the cells were lysed and examined  
5 by western blotting using anti-Syntaxin7, -Syntaxin8, and actin antibodies. (B) HeLa cells  
6 stably expressing GFP-LC3 were transfected with siRNA for the control, Syntaxin7, and  
7 Syntaxin8. After 48 hours, the cells were infected with GAS for 180 minutes at an MOI of  
8 100 as described in Materials and Methods. Following fixation, the cells were incubated with  
9 anti-LAMP1 antibodies and observed with a confocal microscope. Cellular and bacterial  
10 DNA were stained with DAPI. The boxed regions in the upper panels are enlarged in the  
11 lower panels. Bars indicate 10  $\mu\text{m}$  (upper panels) or 5  $\mu\text{m}$  (lower panels). (C) The  
12 co-localization frequencies of GcAVs with LAMP1 signals were manually measured and are  
13 presented as the percentage of total number of GcAVs. Data shown represent results of more  
14 than 30 cells.

15  
16 **Supplemental Figure 2. Maturation of canonical autophagosomes in Syntaxin7 and**  
17 **Syntaxin8-depleted cells.** (A) MCF7 cells were transfected with siRNA for the control,  
18 Syntaxin7, and Syntaxin8. At 48 hours after transfection, the cells were lysed, then examined  
19 by western blotting using anti-Syntaxin7, -Syntaxin8, and actin antibodies. (B) MCF7 cells  
20 stably expressing GFP-LC3 were treated with siRNA in the same manner as described in  
21 Supplemental Figure 2A. The cells were further cultured in growth medium (Fed) or EBS  
22 solution (Starved) for the indicated times, then fixed and observed with a confocal microscope.  
23 Cellular DNA was stained with DAPI (blue). Bars indicate 10  $\mu\text{m}$ . (C) siRNA-treated MCF7  
24 cells were cultured in Fed and Starved conditions for 240 minutes, then the cellular lysates  
25 were subjected to western blotting using anti-LC3 and actin antibodies.

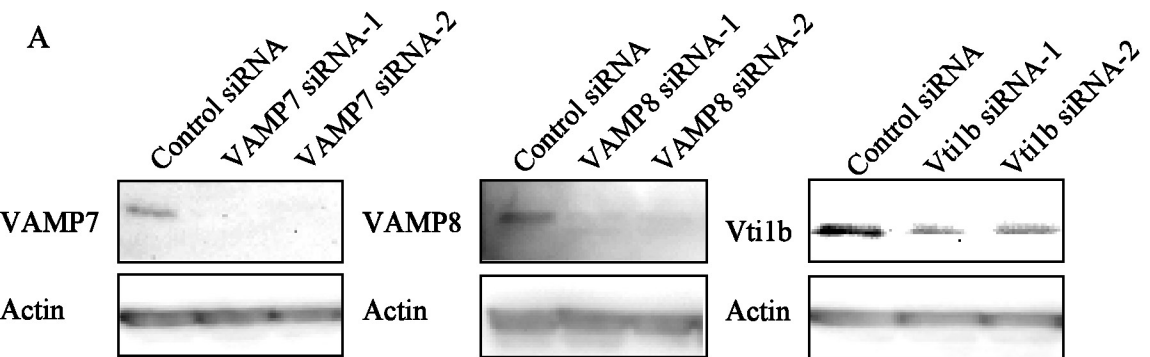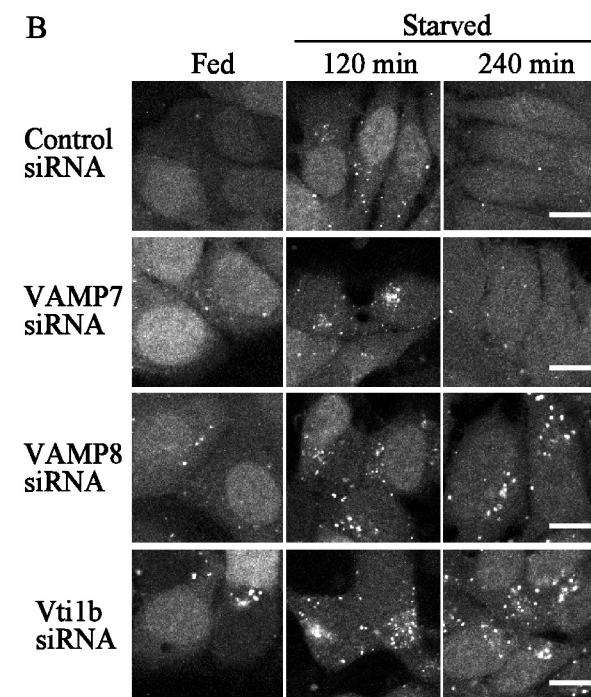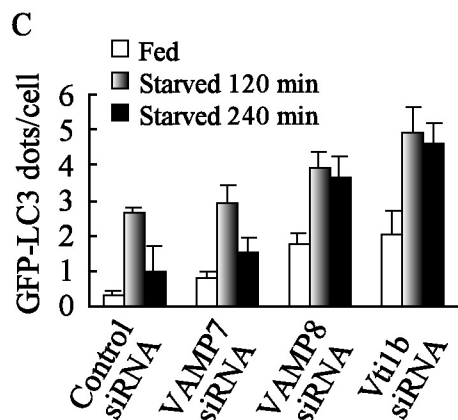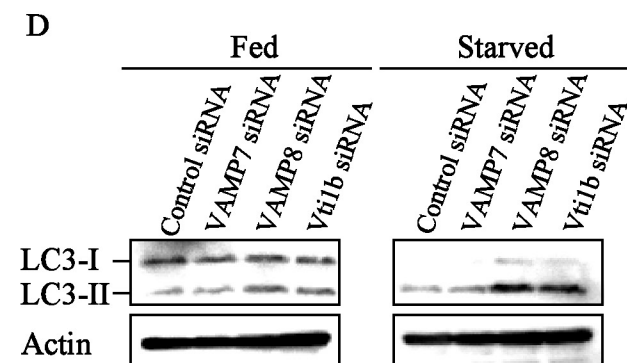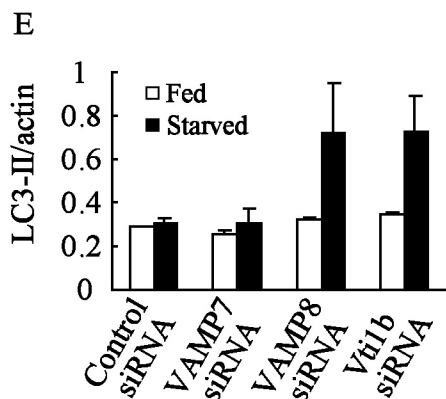

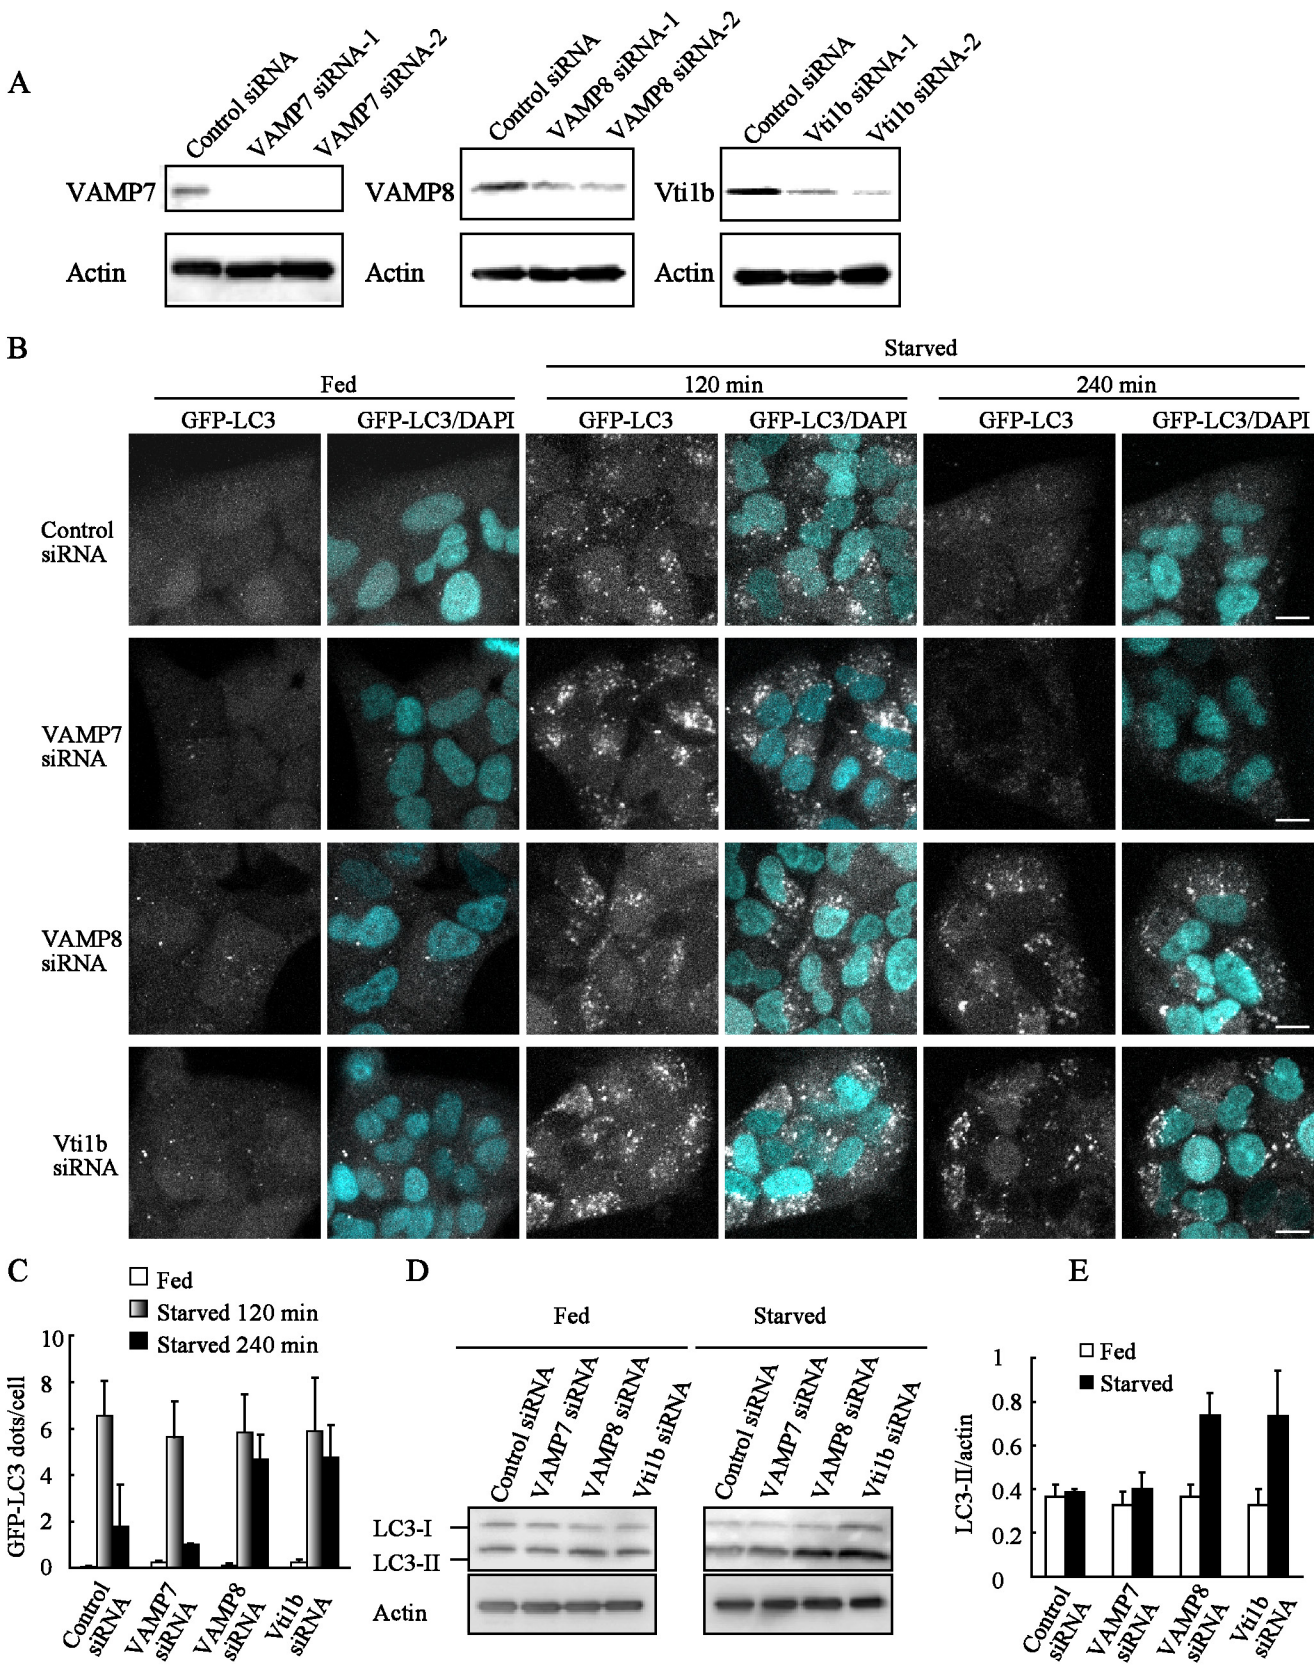

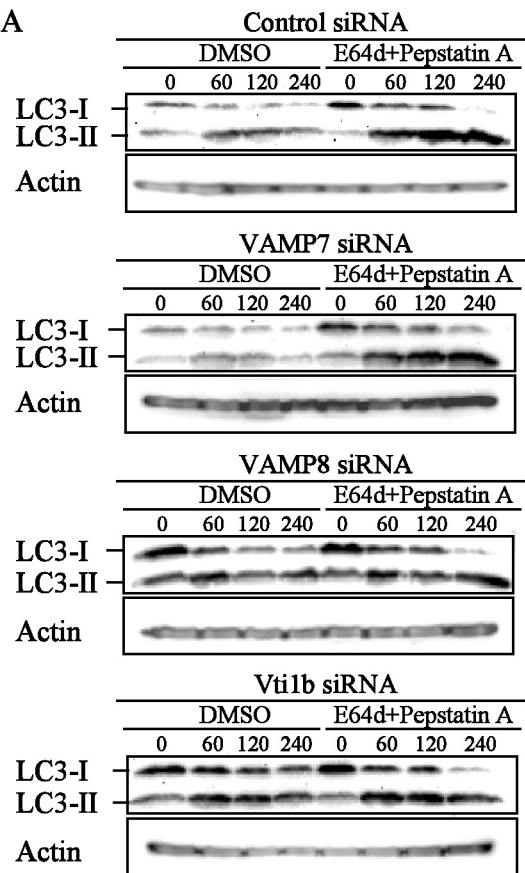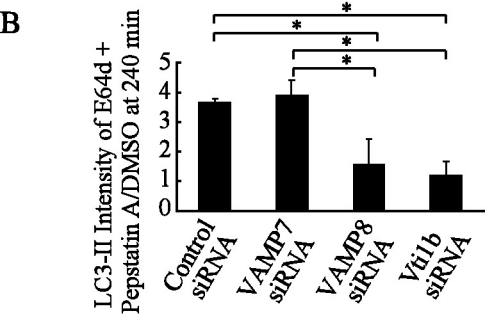

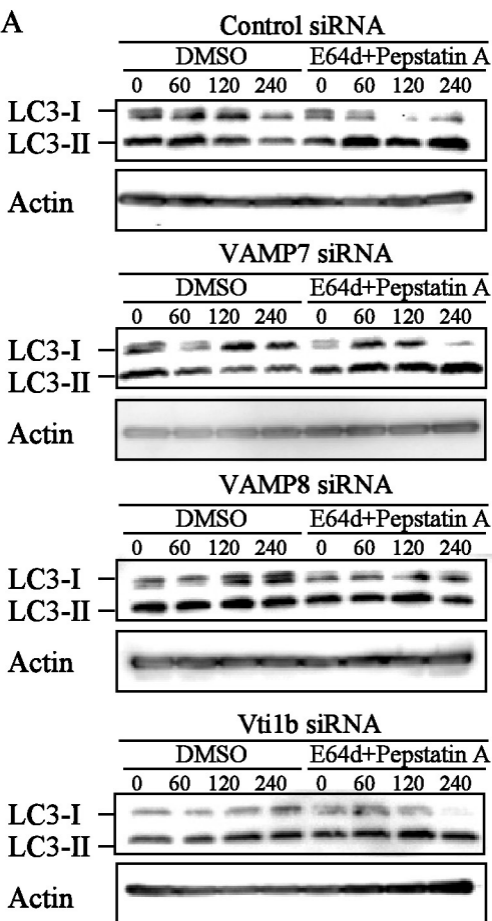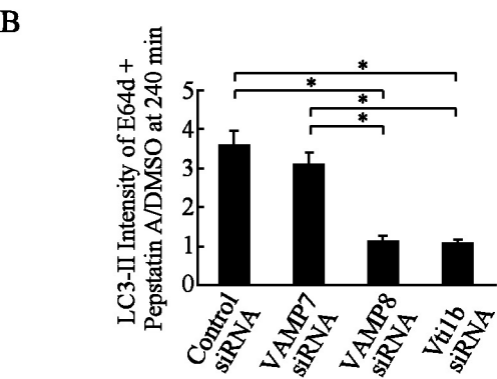

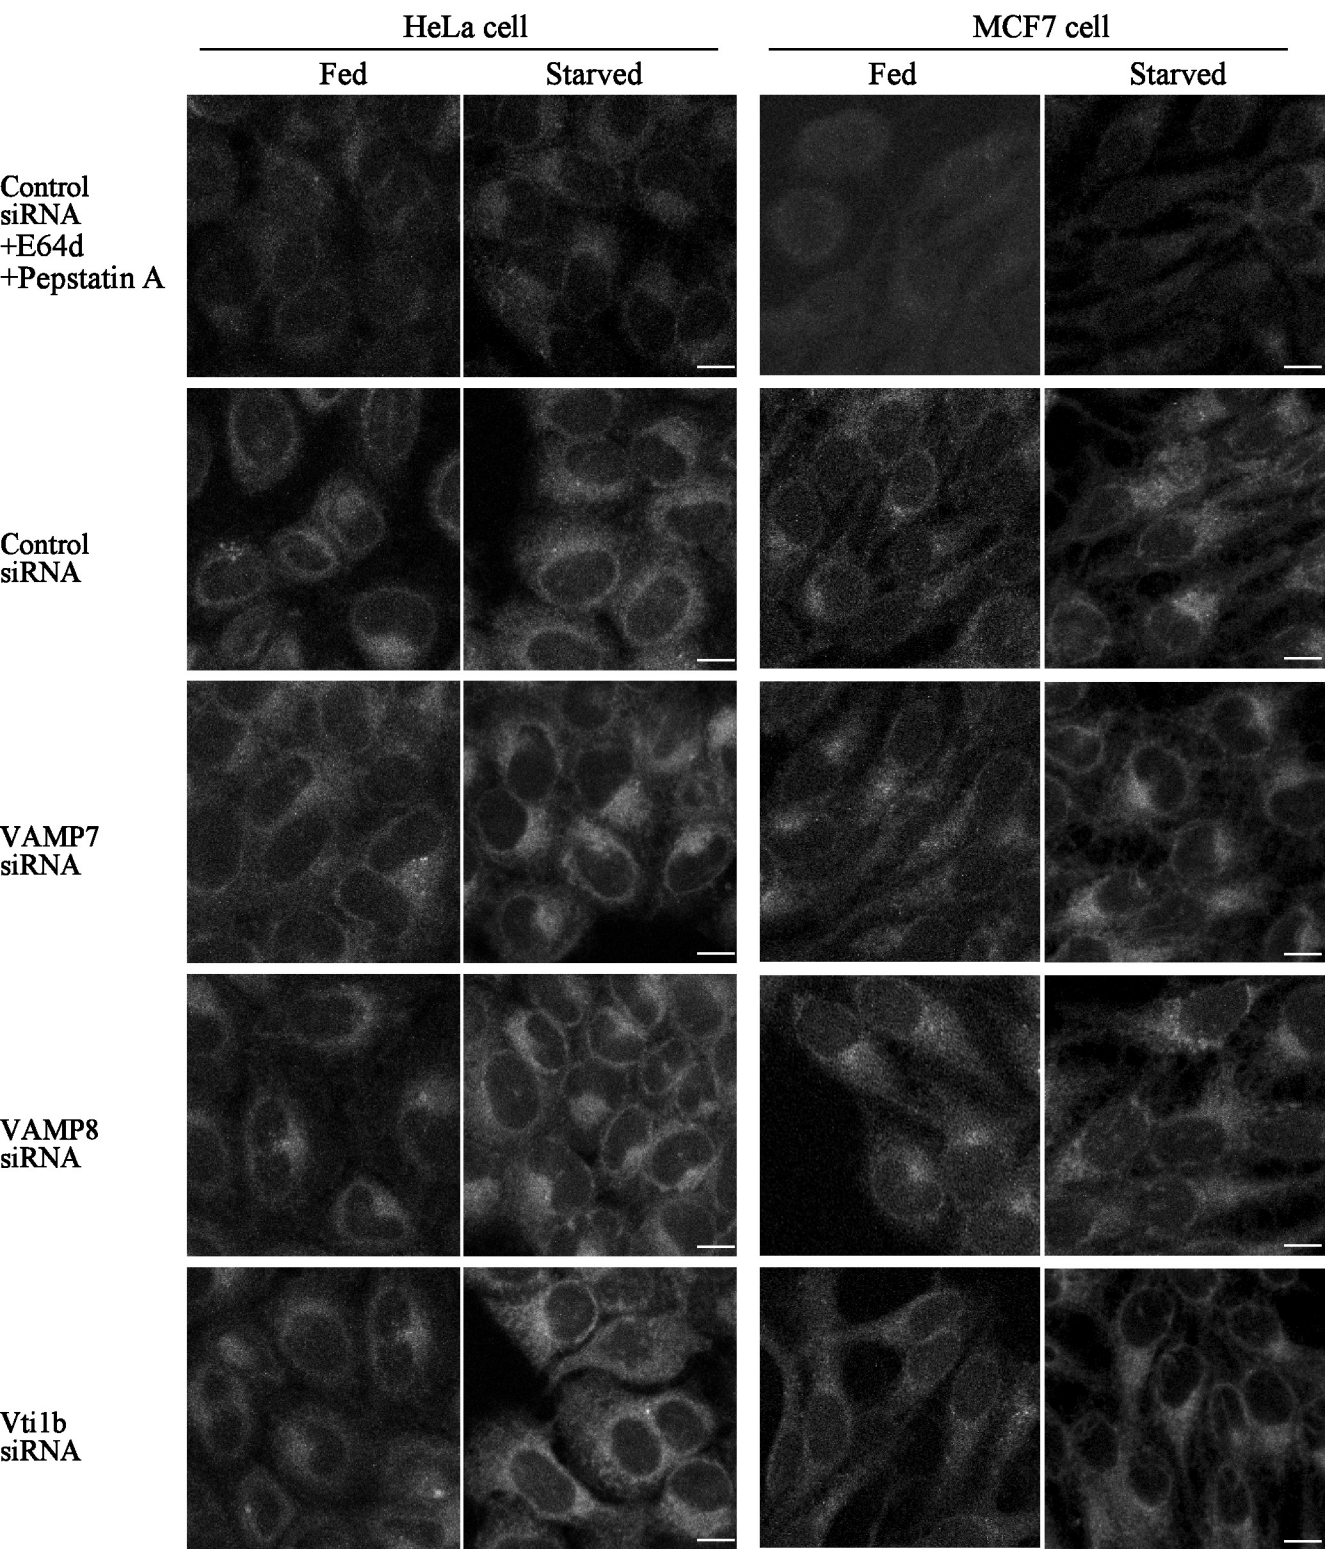

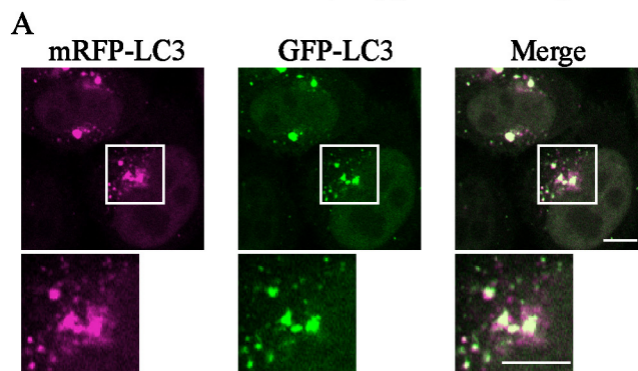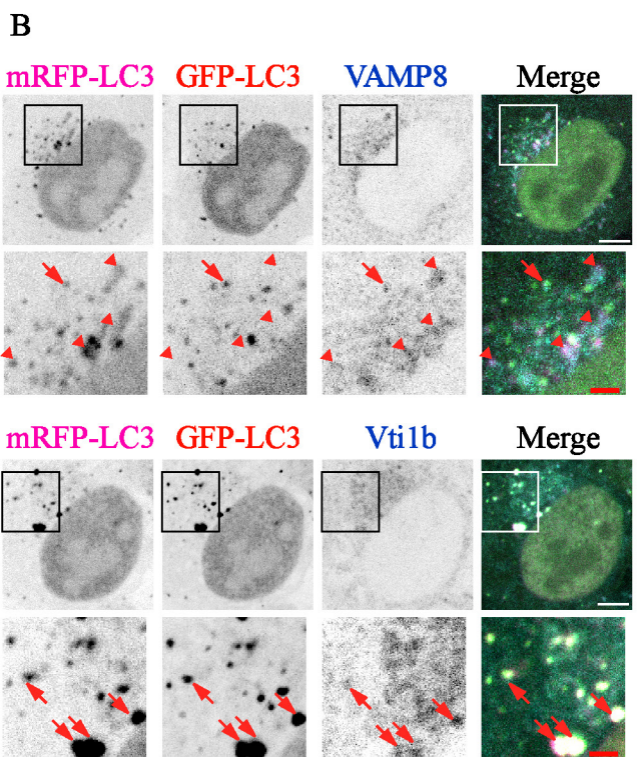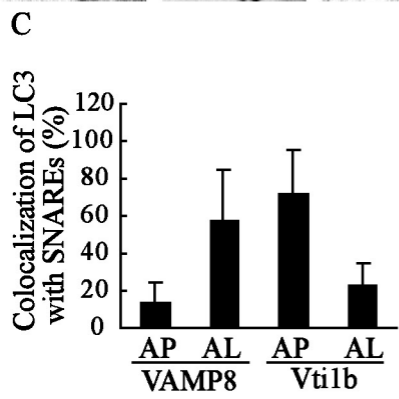

Furuta *et al.*, Supplemental Figure 7

HeLa cell

MCF7 cell

Control siRNA

Vti1b siRNA-1

Vti1b siRNA-2

Control siRNA

Vti1b siRNA-1

Vti1b siRNA-2

Vti1b

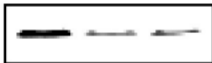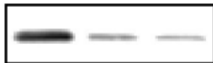

Vti1a

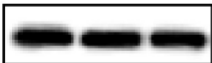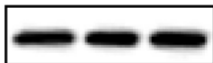

Actin

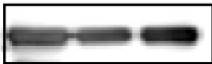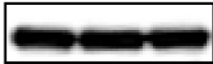

Supplement: E09-08-0693_1.pdf [file E09-08-0693_1.pdf]
